# Supplementary figures and images for: High-performance ultraviolet detector based on self-assembled 3D/2D perovskite heterostructure
Source: Royal Society of Chemistry journal article supplement (doi:10.1039/d4ra05576d), 2024-01-01

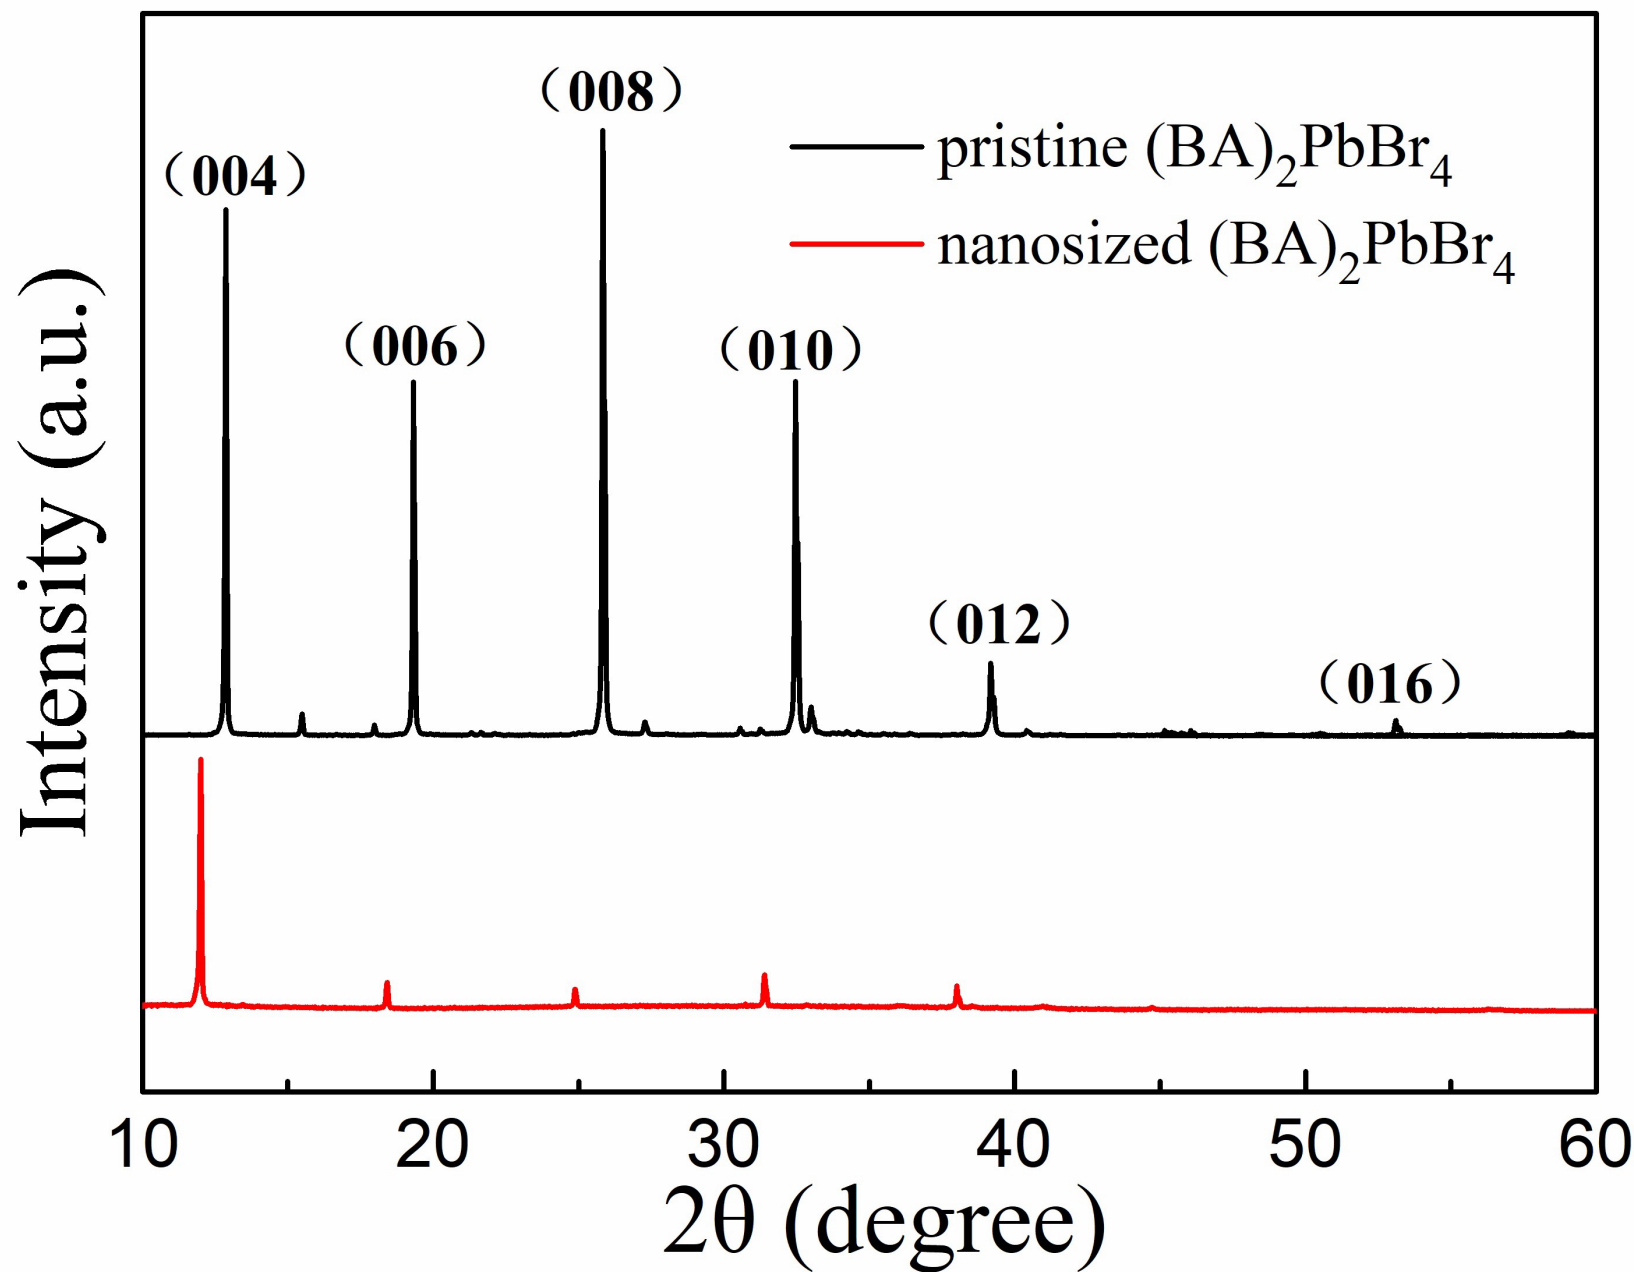

Supplement: d4ra05576d1.pdf [file d4ra05576d1.pdf]

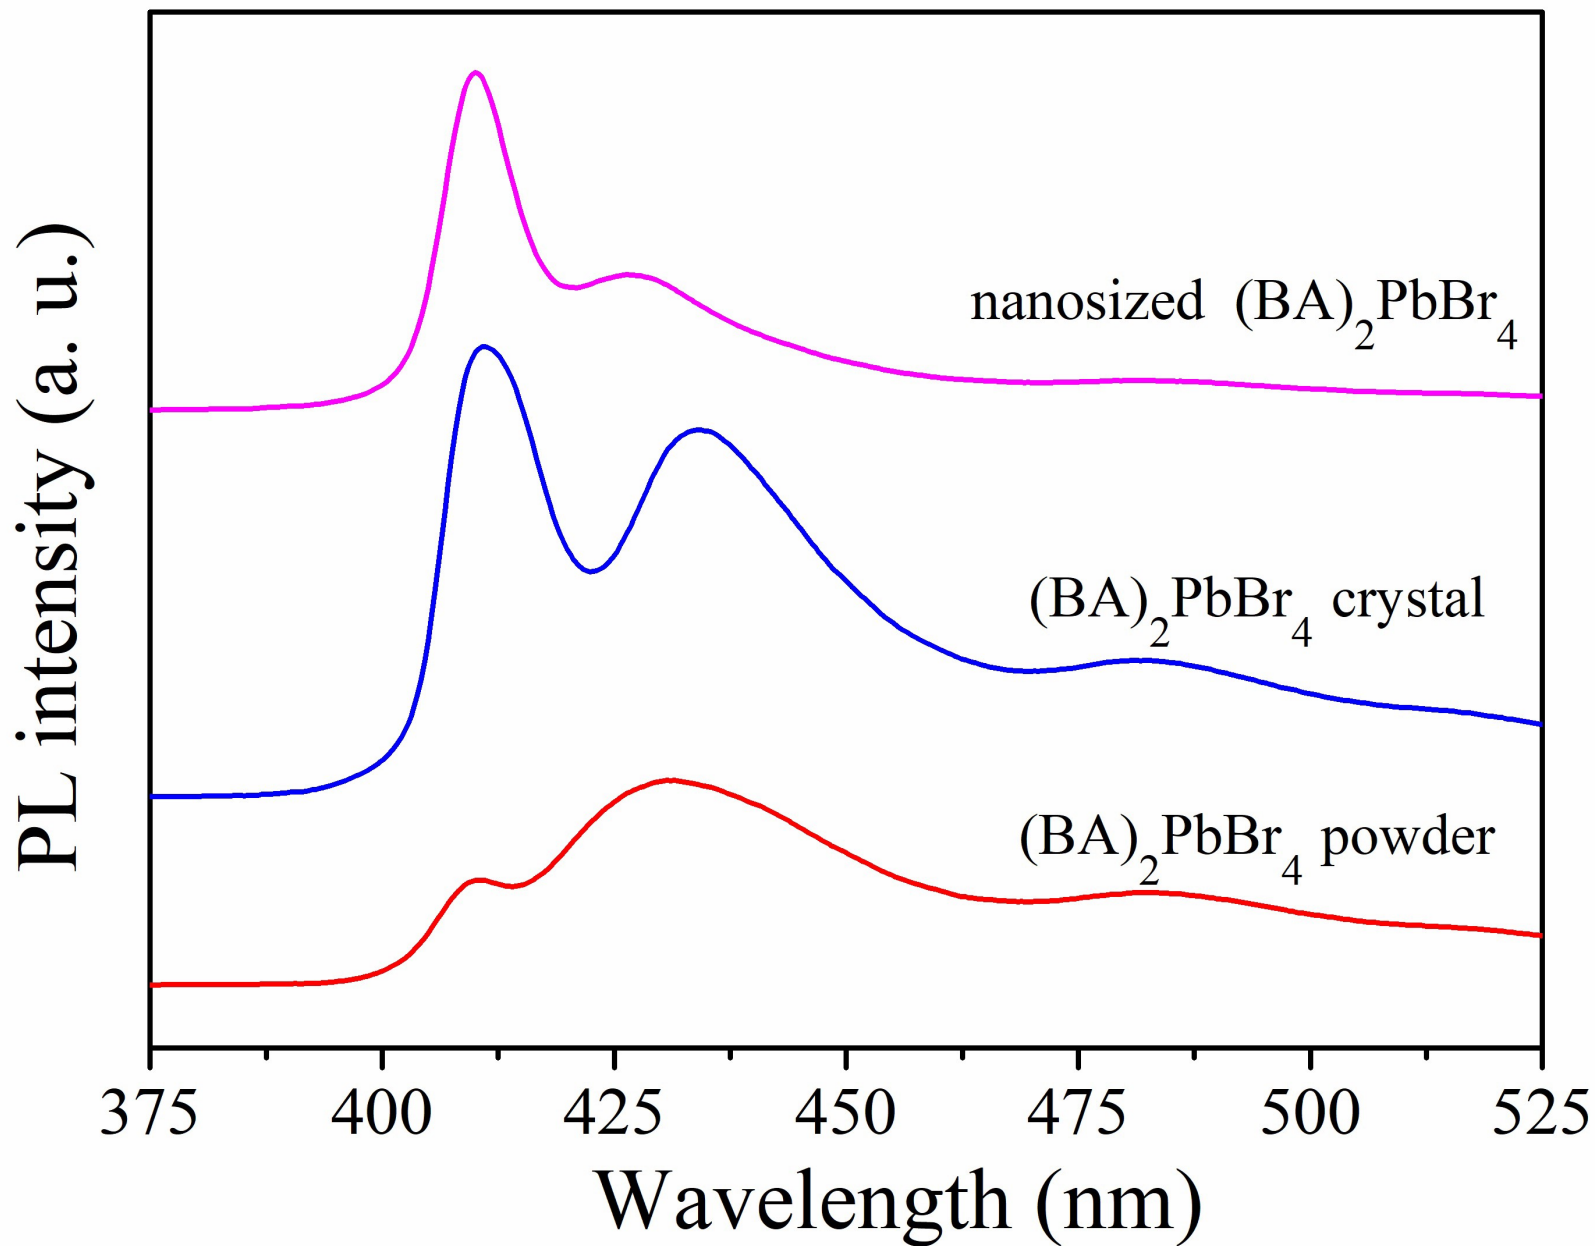

Supplement: d4ra05576d2.pdf [file d4ra05576d2.pdf]
